# Supplementary material for: Polygenic risk scores across the extended psychosis spectrum
Source: PubMed Central journal article supplement (PMC8626446; doi:10.1038/s41398-021-01720-0), 2021-11-26
Supplement: 41398_2021_1720_MOESM1_ESM.pdf [file 41398_2021_1720_MOESM1_ESM.pdf]

Supplementary Information for:

## **Polygenic risk scores across the extended psychosis spectrum**

### Content:

Supplementary Methods and Materials

Supplementary Tables S1, S2, S3, S4

Supplementary Fig. S1

Supplementary References

### **Supplementary Methods and Materials: Ethical approval for the “PsyCourse” project**

Initially, the project was approved by the Ethics Committee of the University Medical Center Göttingen. Some participating clinical centers were teaching hospitals of the University Medical Center Göttingen and were thus covered by this initial approval. For the remaining clinical sites, an additional approval from the respective Ethics Committees was obtained. These were as follows (clinical centers, project identification codes and dates of approval are reported in brackets): Ethics Committees of the University Medical Center Göttingen (UMG Göttingen, Bad Zwischenahn, Eschwege, Asklepios Specialized Hospital Göttingen, Hildesheim, Lüneburg, Liebenburg, Osnabrück, Rotenburg, Tiefenbrunn, Wilhemshaven; 23/9/10; 3<sup>rd</sup> of December 2010), Medical Faculty of the LMU Munich (Munich and Augsburg; 17-13; 25<sup>th</sup> of February 2013), Medical Faculty of the RU Bochum (Bochum; 4644-13; 18<sup>th</sup> of June 2013), Medical Association Bremen (Bremen Ost; 337; 20<sup>th</sup> of April 2012), Medical University of Graz (Graz; 25-335 ex 12/13; 13<sup>th</sup> of June 2013), Ulm University (Günzburg; 236/12; 10<sup>th</sup> of September 2012) and Medical Association Westfalen-Lippe and Medical Faculty University of Münster (Münster; 2015-011-b-S; 20<sup>th</sup> of January 2015), Medical Faculty of the University of Tübingen (Tübingen; 096/2013BO1; 19<sup>th</sup> of June 2013).

**Table S1.** Primary inclusion criteria for the studied groups.

| Group |                                                  | Phenotypic definition / inclusion criteria                                                                                                                                                                                                                                                                                                                                                                                                                                                          |                            |
|-------|--------------------------------------------------|-----------------------------------------------------------------------------------------------------------------------------------------------------------------------------------------------------------------------------------------------------------------------------------------------------------------------------------------------------------------------------------------------------------------------------------------------------------------------------------------------------|----------------------------|
| 1.    | Schizophrenia (SZ) <sup>a</sup>                  | DSM-IV diagnosis: 295.10/295.20/295.30/295.60/295.90                                                                                                                                                                                                                                                                                                                                                                                                                                                | Higher end of the spectrum |
| 2.    | Schizoaffective disorder (SZA) <sup>a</sup>      | DSM-IV diagnosis: 295.70                                                                                                                                                                                                                                                                                                                                                                                                                                                                            |                            |
| 3.    | Bipolar II disorder (BD II) <sup>a</sup>         | DSM-IV diagnosis: 296.89                                                                                                                                                                                                                                                                                                                                                                                                                                                                            |                            |
| 4.    | Bipolar I disorder (BD I) <sup>a</sup>           | DSM-IV diagnosis: 296.x                                                                                                                                                                                                                                                                                                                                                                                                                                                                             |                            |
| 5.    | At-risk state for psychosis (RISK) <sup>b</sup>  | [i] at least one cognitive-perceptive basic symptom (COPER) and/or<br>[ii] at least two cognitive disturbances (COGDIS) and/or<br>[iii] at least one attenuated psychotic symptom (APS) and/or<br>[iiii] at least one brief limited intermittent psychotic symptom (BLIPS).<br><br>• [i–ii] = high-risk (HR) criteria (1), based on the Schizophrenia Proneness Interview (2);<br>• [iii–iiii] = ultra-high risk (UHR) criteria (1), based on the Structured Interview for Prodromal Syndromes (3). | Lower end of the spectrum  |
| 6.    | Higher schizotypy (SCHIZ H) <sup>c</sup>         | • threshold of >19 from the group median-split on the Schizotypal Personality Questionnaire (SPQ total score) (4);<br>• clinical diagnosis was excluded using the Mini-International Neuropsychiatric Interview (5).                                                                                                                                                                                                                                                                                |                            |
| 7.    | Lower schizotypy (SCHIZ L) <sup>c</sup>          | • threshold of ≤19 from the group median-split on the SPQ total score;<br>• clinical diagnosis was excluded using the Mini-International Neuropsychiatric Interview (5).                                                                                                                                                                                                                                                                                                                            |                            |
| 8.    | Non-psychiatric controls (CTRL) <sup>a,d,e</sup> | • according to the current and past mental health status from the Short Diagnostic Interview for Mental Disorders (6), Structured Clinical Interview for the DSM (SCID) (7) or Schedule for Affective Disorders and Schizophrenia for School-Age Children-Present and Lifetime (K-SADS-PL) (8).                                                                                                                                                                                                     |                            |

Notes: <sup>a</sup>PsyCourse Study; <sup>b</sup>ZInEP study; <sup>c</sup>EE study; <sup>d</sup>Zurich Family-Trio study; <sup>e</sup>Zurich OCD study.

**Table S2.** Results of the pairwise comparisons across eight investigated groups on polygenic risk scores (PRS) for schizophrenia and bipolar disorder.

| Polygenic risk score for schizophrenia (SZ-PRS)    |        |       |      |         |          |          |                        |                        |
|----------------------------------------------------|--------|-------|------|---------|----------|----------|------------------------|------------------------|
| Pairwise contrast                                  | Beta   | SE    | df   | T ratio | Lower CI | Upper CI | Adjusted p             | p                      |
| CTRL-SCHIZ L                                       | -0.003 | 0.109 | 1565 | -0.028  | -0.344   | 0.338    | 1.000                  | 0.978                  |
| CTRL-SCHIZ H                                       | 0.147  | 0.110 | 1565 | 1.336   | -0.197   | 0.490    | 1.000                  | 0.182                  |
| CTRL-RISK                                          | -0.248 | 0.113 | 1565 | -2.195  | -0.601   | 0.105    | 0.793                  | 0.028                  |
| CTRL-BDI                                           | -0.242 | 0.078 | 1565 | -3.106  | -0.485   | 0.002    | 0.054                  | 0.002                  |
| CTRL-BDII                                          | -0.112 | 0.115 | 1565 | -0.976  | -0.473   | 0.248    | 1.000                  | 0.329                  |
| CTRL-SZA                                           | -0.537 | 0.121 | 1565 | -4.454  | -0.914   | -0.160   | 2.53×10 <sup>-4</sup>  | 9.03×10 <sup>-6</sup>  |
| CTRL-SZ                                            | -0.474 | 0.076 | 1565 | -6.232  | -0.712   | -0.236   | 1.65×10 <sup>-8</sup>  | 5.91×10 <sup>-10</sup> |
| SCHIZ L-SCHIZ H                                    | 0.150  | 0.128 | 1565 | 1.168   | -0.251   | 0.551    | 1.000                  | 0.243                  |
| SCHIZ L-RISK                                       | -0.245 | 0.128 | 1565 | -1.909  | -0.646   | 0.156    | 1.000                  | 0.057                  |
| SCHIZ L-BDI                                        | -0.238 | 0.111 | 1565 | -2.149  | -0.586   | 0.109    | 0.891                  | 0.032                  |
| SCHIZ L-BDII                                       | -0.109 | 0.140 | 1565 | -0.781  | -0.547   | 0.329    | 1.000                  | 0.435                  |
| SCHIZ L-SZA                                        | -0.534 | 0.146 | 1565 | -3.664  | -0.989   | -0.078   | 0.007                  | 2.57×10 <sup>-4</sup>  |
| SCHIZ L-SZ                                         | -0.471 | 0.109 | 1565 | -4.327  | -0.812   | -0.130   | 4.50×10 <sup>-4</sup>  | 1.61×10 <sup>-5</sup>  |
| SCHIZ H-RISK                                       | -0.394 | 0.129 | 1565 | -3.057  | -0.798   | 0.009    | 0.064                  | 0.002                  |
| SCHIZ H-BDI                                        | -0.388 | 0.112 | 1565 | -3.466  | -0.739   | -0.038   | 0.015                  | 5.42×10 <sup>-4</sup>  |
| SCHIZ H-BDII                                       | -0.259 | 0.141 | 1565 | -1.843  | -0.699   | 0.181    | 1.000                  | 0.065                  |
| SCHIZ H-SZA                                        | -0.683 | 0.146 | 1565 | -4.669  | -1.141   | -0.225   | 9.18×10 <sup>-5</sup>  | 3.28×10 <sup>-6</sup>  |
| SCHIZ H-SZ                                         | -0.621 | 0.110 | 1565 | -5.637  | -0.966   | -0.276   | 5.73×10 <sup>-7</sup>  | 2.05×10 <sup>-8</sup>  |
| RISK-BDI                                           | 0.006  | 0.119 | 1565 | 0.051   | -0.365   | 0.377    | 1.000                  | 0.959                  |
| RISK-BDII                                          | 0.135  | 0.146 | 1565 | 0.927   | -0.321   | 0.592    | 1.000                  | 0.354                  |
| RISK-SZA                                           | -0.289 | 0.152 | 1565 | -1.908  | -0.763   | 0.185    | 1.000                  | 0.057                  |
| RISK-SZ                                            | -0.227 | 0.115 | 1565 | -1.966  | -0.587   | 0.134    | 1.000                  | 0.049                  |
| BDI-BDII                                           | 0.129  | 0.112 | 1565 | 1.158   | -0.22    | 0.478    | 1.000                  | 0.247                  |
| BDI-SZA                                            | -0.295 | 0.117 | 1565 | -2.518  | -0.662   | 0.072    | 0.333                  | 0.012                  |
| BDI-SZ                                             | -0.233 | 0.072 | 1565 | -3.237  | -0.458   | -0.008   | 0.035                  | 0.001                  |
| BDII-SZA                                           | -0.424 | 0.145 | 1565 | -2.93   | -0.877   | 0.029    | 0.096                  | 0.003                  |
| BDII-SZ                                            | -0.362 | 0.112 | 1565 | -3.239  | -0.711   | -0.012   | 0.034                  | 0.001                  |
| SZA-SZ                                             | 0.062  | 0.117 | 1565 | 0.533   | -0.304   | 0.429    | 1.000                  | 0.594                  |
| Polygenic risk score for bipolar disorder (BD-PRS) |        |       |      |         |          |          |                        |                        |
| Pairwise contrast                                  | Est    | SE    | df   | T ratio | Lower CI | Upper CI | Adjusted P             | P                      |
| CTRL-SCHIZ L                                       | -0.008 | 0.109 | 1565 | -0.07   | -0.348   | 0.333    | 1.000                  | 0.944                  |
| CTRL-SCHIZ H                                       | -0.011 | 0.110 | 1565 | -0.102  | -0.354   | 0.332    | 1.000                  | 0.919                  |
| CTRL-RISK                                          | -0.412 | 0.113 | 1565 | -3.657  | -0.764   | -0.059   | 0.007                  | 2.64×10 <sup>-4</sup>  |
| CTRL-BDI                                           | -0.558 | 0.078 | 1565 | -7.187  | -0.801   | -0.315   | 2.86×10 <sup>-11</sup> | 1.02×10 <sup>-12</sup> |
| CTRL-BDII                                          | -0.461 | 0.115 | 1565 | -4.011  | -0.821   | -0.101   | 0.002                  | 6.34×10 <sup>-5</sup>  |
| CTRL-SZA                                           | -0.572 | 0.120 | 1565 | -4.758  | -0.949   | -0.196   | 5.99×10 <sup>-5</sup>  | 2.14×10 <sup>-6</sup>  |
| CTRL-SZ                                            | -0.207 | 0.076 | 1565 | -2.726  | -0.445   | 0.031    | 0.182                  | 0.006                  |
| SCHIZ L-SCHIZ H                                    | -0.004 | 0.128 | 1565 | -0.028  | -0.404   | 0.397    | 1.000                  | 0.978                  |
| SCHIZ L-RISK                                       | -0.404 | 0.128 | 1565 | -3.16   | -0.804   | -0.004   | 0.045                  | 0.002                  |
| SCHIZ L-BDI                                        | -0.550 | 0.111 | 1565 | -4.967  | -0.897   | -0.204   | 2.11×10 <sup>-5</sup>  | 7.54×10 <sup>-7</sup>  |
| SCHIZ L-BDII                                       | -0.453 | 0.140 | 1565 | -3.246  | -0.890   | -0.016   | 0.034                  | 0.001                  |
| SCHIZ L-SZA                                        | -0.565 | 0.145 | 1565 | -3.884  | -1.019   | -0.110   | 0.003                  | 1.07×10 <sup>-4</sup>  |
| SCHIZ L-SZ                                         | -0.199 | 0.109 | 1565 | -1.834  | -0.540   | 0.141    | 1.000                  | 0.067                  |
| SCHIZ H-RISK                                       | -0.401 | 0.129 | 1565 | -3.111  | -0.803   | 0.002    | 0.053                  | 0.002                  |
| SCHIZ H-BDI                                        | -0.547 | 0.112 | 1565 | -4.891  | -0.897   | -0.197   | 3.10×10 <sup>-5</sup>  | 1.11×10 <sup>-6</sup>  |
| SCHIZ H-BDII                                       | -0.450 | 0.140 | 1565 | -3.207  | -0.889   | -0.011   | 0.038                  | 0.001                  |

|             |        |       |      |        |        |        |                       |                       |
|-------------|--------|-------|------|--------|--------|--------|-----------------------|-----------------------|
| SCHIZ H-SZA | -0.561 | 0.146 | 1565 | -3.841 | -1.018 | -0.104 | 0.004                 | 1.28×10 <sup>-4</sup> |
| SCHIZ H-SZ  | -0.196 | 0.110 | 1565 | -1.781 | -0.540 | 0.148  | 1.000                 | 0.075                 |
| RISK-BDI    | -0.146 | 0.118 | 1565 | -1.236 | -0.516 | 0.224  | 1.000                 | 0.217                 |
| RISK-BDII   | -0.049 | 0.146 | 1565 | -0.338 | -0.505 | 0.406  | 1.000                 | 0.735                 |
| RISK-SZA    | -0.160 | 0.151 | 1565 | -1.061 | -0.634 | 0.313  | 1.000                 | 0.289                 |
| RISK-SZ     | 0.205  | 0.115 | 1565 | 1.78   | -0.155 | 0.565  | 1.000                 | 0.075                 |
| BDI-BDII    | 0.097  | 0.111 | 1565 | 0.87   | -0.251 | 0.445  | 1.000                 | 0.384                 |
| BDI-SZA     | -0.014 | 0.117 | 1565 | -0.122 | -0.380 | 0.352  | 1.000                 | 0.903                 |
| BDI-SZ      | 0.351  | 0.072 | 1565 | 4.89   | 0.126  | 0.575  | 3.12×10 <sup>-5</sup> | 1.11×10 <sup>-6</sup> |
| BDII-SZA    | -0.111 | 0.145 | 1565 | -0.769 | -0.563 | 0.341  | 1.000                 | 0.442                 |
| BDII-SZ     | 0.254  | 0.112 | 1565 | 2.278  | -0.095 | 0.603  | 0.640                 | 0.023                 |
| SZA-SZ      | 0.365  | 0.117 | 1565 | 3.127  | 0.000  | 0.731  | 0.050                 | 0.002                 |

*Note:* The analyses accounted for age, sex, and the first five genetic ancestry principal components. Adjusted *p*, Bonferroni adjusted *p*-values per analysis; Beta, Beta Coefficient; CI, confidence interval; *df*, degrees of freedom; Est, Estimate; SE, Standard Error. Group abbreviations: BD I, bipolar I disorder; BD II, bipolar II disorder; CTRL, controls; RISK, at-risk state for psychosis; SCHIZ L, lower schizotypy; SCHIZ H, higher schizotypy; SZA, schizoaffective disorder; SZ, schizophrenia.

**Table S3.** Binary logistic regression for case–control contrasts across the polygenic risk scores (PRS) for schizophrenia and bipolar disorder.

| Polygenic risk score for schizophrenia (SZ-PRS)    |                |            |              |                           |       |             |
|----------------------------------------------------|----------------|------------|--------------|---------------------------|-------|-------------|
| Measure pair                                       | Baseline $R^2$ | Full $R^2$ | $R^2 \Delta$ | $p R^2 \Delta$            | OR    | 95% CI      |
| SZ–CTRL                                            | 0.136          | 0.194      | 0.057        | $6.88 \times 10^{-9***}$  | 1.624 | 1.374–1.930 |
| SZA–CTRL                                           | 0.191          | 0.252      | 0.061        | $2.04 \times 10^{-5***}$  | 1.823 | 1.375–2.454 |
| BD II–CTRL                                         | 0.129          | 0.130      | 0.002        | 0.500                     | 1.093 | 0.845–1.419 |
| BD I–CTRL                                          | 0.151          | 0.164      | 0.013        | 0.006**                   | 1.268 | 1.070–1.508 |
| RISK–CTRL                                          | 0.560          | 0.576      | 0.016        | 0.006**                   | 1.571 | 1.139–2.203 |
| SCHIZ H–CTRL                                       | 0.226          | 0.228      | 0.002        | 0.440                     | 0.909 | 0.713–1.158 |
| SCHIZ L–CTRL                                       | 0.267          | 0.268      | <0.001       | 0.773                     | 1.038 | 0.804–1.346 |
| Polygenic risk score for bipolar disorder (BD-PRS) |                |            |              |                           |       |             |
| SZ–CTRL                                            | 0.136          | 0.148      | 0.011        | 0.011*                    | 1.235 | 1.050–1.456 |
| SZA–CTRL                                           | 0.191          | 0.263      | 0.072        | $3.41 \times 10^{-6***}$  | 1.959 | 1.464–2.665 |
| BD II–CTRL                                         | 0.129          | 0.175      | 0.047        | $1.98 \times 10^{-4***}$  | 1.649 | 1.263–2.175 |
| BD I–CTRL                                          | 0.151          | 0.228      | 0.077        | $2.53 \times 10^{-11***}$ | 1.797 | 1.505–2.162 |
| RISK–CTRL                                          | 0.560          | 0.600      | 0.040        | $8.21 \times 10^{-6***}$  | 2.186 | 1.533–3.201 |
| SCHIZ H–CTRL                                       | 0.226          | 0.228      | 0.003        | 0.340                     | 1.137 | 0.874–1.485 |
| SCHIZ L–CTRL                                       | 0.267          | 0.269      | 0.001        | 0.501                     | 1.090 | 0.848–1.406 |

*Note:* The reported estimates of change ( $\Delta$ ) in  $R^2$  represent the gain from adding polygenic risk score (Full  $R^2$ ) to the model with covariates only (age, sex, five genetic ancestry principal components; Baseline  $R^2$ ) in a block-wise binary regression. Significant effects from adding PRS to the model are marked with asterisks (\*,  $p < 0.05$ ; \*\*,  $p < 0.01$ ; \*\*\*,  $p < 0.001$ ). CI, Confidence Interval. Group abbreviations: BD I, bipolar I disorder; BD II, bipolar II disorder; CTRL, controls; RISK, at-risk state for psychosis; SCHIZ H, higher schizotypy; SCHIZ L, lower schizotypy; SZA, schizoaffective disorder; SZ, schizophrenia.

**Table S4.** Results of the quantile regression analysis of polygenic risk scores (PRS) predicting symptoms.

| <b>Polygenic risk score for schizophrenia (SZ-PRS)</b>    |                 |                    |                       |                    |                          |
|-----------------------------------------------------------|-----------------|--------------------|-----------------------|--------------------|--------------------------|
| <b>Measure</b>                                            | <b>Quantile</b> | <b>Coefficient</b> | <b>SE</b>             | <b>T-statistic</b> | <b>p</b>                 |
| PANSS Positive Symptoms                                   | tau = 0.25      | 0.000              | 1.23×10 <sup>29</sup> | 0.000              | 1.000                    |
|                                                           | tau = 0.50      | 3.351              | 0.690                 | 4.859              | 1.35×10 <sup>-6***</sup> |
|                                                           | tau = 0.75      | 4.291              | 1.715                 | 2.502              | 0.013*                   |
| PANSS Negative Symptoms                                   | tau = 0.25      | 0.000              | 0.355                 | 0.000              | 1.000                    |
|                                                           | tau = 0.50      | 3.260              | 1.234                 | 2.643              | 0.008**                  |
|                                                           | tau = 0.75      | 3.376              | 2.327                 | 1.451              | 0.147                    |
| PANSS General Psychopathology                             | tau = 0.25      | 3.225              | 0.946                 | 3.410              | 6.70×10 <sup>-4***</sup> |
|                                                           | tau = 0.50      | 4.895              | 2.158                 | 2.269              | 0.023*                   |
|                                                           | tau = 0.75      | 4.185              | 2.686                 | 1.558              | 0.120                    |
| PANSS Total Score                                         | tau = 0.25      | 6.128              | 1.586                 | 3.864              | 1.18×10 <sup>-4***</sup> |
|                                                           | tau = 0.50      | 11.725             | 3.681                 | 3.185              | 0.001**                  |
|                                                           | tau = 0.75      | 13.791             | 5.222                 | 2.641              | 0.008**                  |
| <b>Polygenic risk score for bipolar disorder (BD-PRS)</b> |                 |                    |                       |                    |                          |
| PANSS Positive Symptoms                                   | tau = 0.25      | 0.000              | 9.51×10 <sup>28</sup> | 0.000              | 1.000                    |
|                                                           | tau = 0.50      | -3.291             | 2.424                 | -1.357             | 0.175                    |
|                                                           | tau = 0.75      | 0.650              | 4.307                 | 0.151              | 0.880                    |
| PANSS Negative Symptoms                                   | tau = 0.25      | 0.000              | 0.717                 | 0.000              | 1.000                    |
|                                                           | tau = 0.50      | 2.608              | 3.268                 | 0.798              | 0.425                    |
|                                                           | tau = 0.75      | -2.869             | 5.645                 | -0.508             | 0.611                    |
| PANSS General Psychopathology                             | tau = 0.25      | 5.776              | 3.565                 | 1.620              | 0.105                    |
|                                                           | tau = 0.50      | 2.821              | 5.407                 | 0.522              | 0.602                    |
|                                                           | tau = 0.75      | -0.904             | 6.687                 | -0.135             | 0.893                    |
| PANSS Total Score                                         | tau = 0.25      | 5.776              | 3.565                 | 1.620              | 0.105                    |
|                                                           | tau = 0.50      | 2.821              | 5.407                 | 0.522              | 0.602                    |
|                                                           | tau = 0.75      | -0.904             | 6.687                 | -0.135             | 0.893                    |

*Note:* The analyses accounted for age, sex and the first five genetic ancestry principal components. \*,  $p < 0.05$ ; \*\*,  $p < 0.01$ ; \*\*\*,  $p < 0.001$ . Abbreviations: PANSS, Positive and Negative Syndrome Scale;  $p$ ,  $p$ -value; SE, Standard Error.

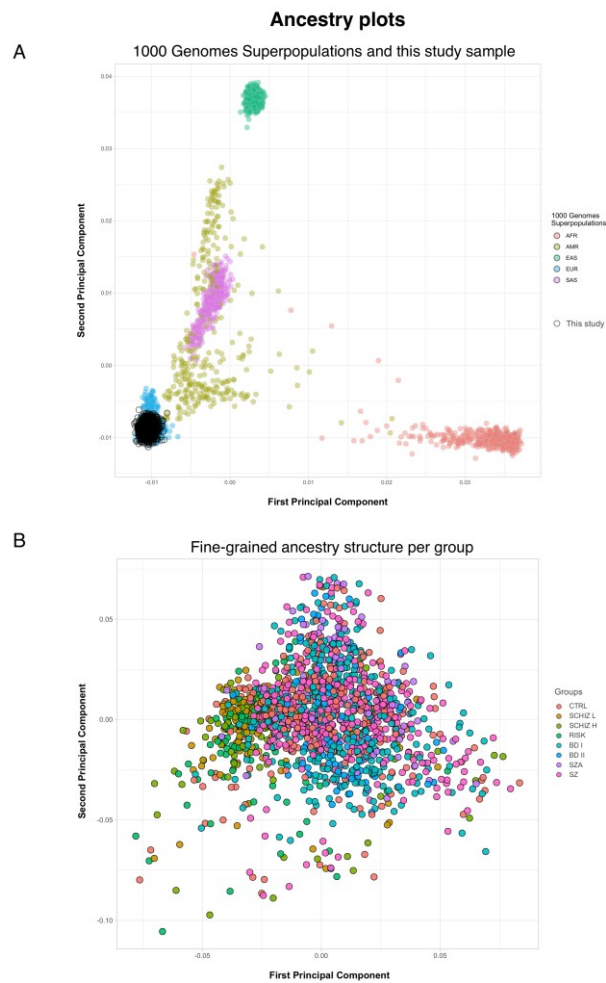

**Figure S1.** Plots of the first two ancestry principal components (A) overlaid onto the 1000 Genomes Project<sup>1</sup> global reference superpopulations and (B) according to study group. The plots confirm the homogeneous European origin of the study sample. Population codes: AFR, African; AMR, Admixed American; CEU, Utah Residents of Northern and Western European Ancestry; EAS, East Asian; EUR, European; FIN, Finnish in Finland; GBR, British in England and Scotland; IBS, Iberian population in Spain; SAS, South Asian; TSI, Tuscany, Italy. Group abbreviations: BD I, bipolar I disorder; BD II, bipolar II disorder; CTRL, control; RISK, at-risk state for psychosis; SCHIZ H, higher schizotypy; SCHIZ L, lower schizotypy; SZA, schizoaffective disorder; SZ, schizophrenia.

### **Supplementary References:**

1. Schultze-Lutter F, Michel C, Schmidt SJ, Schimmelmann BG, Maric NP, Salokangas R, et al. EPA guidance on the early detection of clinical high risk states of psychoses. *European Psychiatry*. 2015;30(3):405-16.
2. Schultze-Lutter F, Addington J, Ruhrmann S, Klosterkötter J. *Schizophrenia proneness instrument, adult version (SPI-A)*. Rome: Giovanni Fioriti. 2007.
3. McGlashan T, Miller T, Woods S, Rosen J, Hoffman R, Davidson L. *Structured interview for prodromal syndromes*. PRIME Research Clinic, Yale School of Medicine, New Haven, CT. 2001.
4. Raine A. The SPQ: a scale for the assessment of schizotypal personality based on DSM-III-R criteria. *Schizophrenia bulletin*. 1991;17(4):555-64.
5. Sheehan DV, Lecrubier Y, Sheehan KH, Amorim P, Janavs J, Weiller E, et al. The Mini-International Neuropsychiatric Interview (M.I.N.I.): the development and validation of a structured diagnostic psychiatric interview for DSM-IV and ICD-10. *Journal of Clinical Psychiatry*. 1998;59 Suppl 20:22-33.
6. Margraf J. *Mini-DIPS: diagnostisches kurz-interview bei psychischen störungen*: Springer-Verlag; 2013.
7. First MB. *Structured clinical interview for the DSM (SCID)*. *The encyclopedia of clinical psychology*. 2014:1-6.
8. Kaufman J, Birmaher B, Brent D, Rao U, Flynn C, Moreci P, et al. Schedule for affective disorders and schizophrenia for school-age children-present and lifetime version (K-SADS-PL): initial reliability and validity data. *Journal of the American Academy of Child & Adolescent Psychiatry*. 1997;36(7):980-8.
